# Supplementary material
Source: MDPI journal article supplement (https://www.mdpi.com/2072-4292/14/12/2807)
Supplement: s1 [file s1]

Table S1. Modeling variable preselection table

| Variable (abbreviation; unit)                                                                                                                                                                                                                                                                                                                                                                                                                                                                                                                                                                                                                                                                                                                                                                                                                                                                                                                                                                                    | Temporal resolution | Spatial scale             | Data source                                                                                                                                                                   |
|------------------------------------------------------------------------------------------------------------------------------------------------------------------------------------------------------------------------------------------------------------------------------------------------------------------------------------------------------------------------------------------------------------------------------------------------------------------------------------------------------------------------------------------------------------------------------------------------------------------------------------------------------------------------------------------------------------------------------------------------------------------------------------------------------------------------------------------------------------------------------------------------------------------------------------------------------------------------------------------------------------------|---------------------|---------------------------|-------------------------------------------------------------------------------------------------------------------------------------------------------------------------------|
| TROPOMI NO <sub>2</sub> (NO <sub>2</sub> _5p; molec/cm <sup>2</sup> )                                                                                                                                                                                                                                                                                                                                                                                                                                                                                                                                                                                                                                                                                                                                                                                                                                                                                                                                            | Daily               | 7 *3.5 km/<br>5.5*3.5 km  | NASA(National Aeronautics and Space Administration)<br>( <a href="https://disc.gsfc.nasa.gov/">https://disc.gsfc.nasa.gov/</a> )                                              |
| Air Pressure (AP; hPa); Air Temperature (AT; °C); Relative Humidity (HD; %); Land Surface Temperature(LST; °C); Cumulative Rainfall at 20-20(RF; mm); Wind Speed (WS; m/s)                                                                                                                                                                                                                                                                                                                                                                                                                                                                                                                                                                                                                                                                                                                                                                                                                                       | Daily               | Station observation<br>ns | National Meteorological Science Data Center<br>( <a href="http://data.cma.cn/">http://data.cma.cn/</a> )                                                                      |
| Boundary layer height(BLH; m); Convective precipitation(CP; m); Surface net solar radiation(FDIR; J/m <sup>2</sup> ); 2m dewpoint temperature(D2M; k); 2m temperature(T2M; k); Mean sea level pressure(MSL; Pa); Surface latent heat flux(SLHF; J/ m <sup>2</sup> ); Surface pressure(SP; Pa); Surface sensible heat flux(SSHF; J/ m <sup>2</sup> ); Surface net solar radiation(ssr; J/ m <sup>2</sup> ); Surface solar radiation downwards(SSRD; J/ m <sup>2</sup> ); Surface thermal radiation downwards(STRD; J/ m <sup>2</sup> ); Total column cloud liquid water(TCLW; kg /m <sup>2</sup> ); Total column ozone(TCO <sub>3</sub> ; kg /m <sup>2</sup> ); Total precipitation(TP; m); Top net solar radiation(TSR; J/ m <sup>2</sup> ); Top net solar radiation, clear sky(TSRC; J/ m <sup>2</sup> ); Top net thermal radiation(TTR; J/ m <sup>2</sup> ); 10m u-component of wind(U10; m/s); 100m u-component of wind (U100; m/s); 10m v-component of wind (V10; m/s); 100m v-component of wind (V100; m/s) | 1-h                 | 0.25°                     | European Space Agency, ERA5<br>( <a href="http://maps.elie.ucl.ac.be/CCI/viewer/index.php">http://maps.elie.ucl.ac.be/CCI/viewer/index.php</a> )                              |
| NDVI/EVI                                                                                                                                                                                                                                                                                                                                                                                                                                                                                                                                                                                                                                                                                                                                                                                                                                                                                                                                                                                                         | 16-day              | 500m                      | (Level-1 and Atmosphere Archive and Distribution System,LAADS)<br><a href="https://ladsweb.modaps.eosdis.nasa.gov/search/">https://ladsweb.modaps.eosdis.nasa.gov/search/</a> |
| Elevation (DEM; m)                                                                                                                                                                                                                                                                                                                                                                                                                                                                                                                                                                                                                                                                                                                                                                                                                                                                                                                                                                                               | -                   | 90m                       | Shuttle Radar Topography Mission<br>SRTM,<br><a href="https://srtm.csi.cgiar.org/srtmdata/">https://srtm.csi.cgiar.org/srtmdata/</a><br>OpenStreetMap, OSM                    |
| Road Network (ROAD)                                                                                                                                                                                                                                                                                                                                                                                                                                                                                                                                                                                                                                                                                                                                                                                                                                                                                                                                                                                              | annual              | -                         | ( <a href="http://download.geofabrik.de/asia/china.html#">http://download.geofabrik.de/asia/china.html#</a> )                                                                 |
| Population (POP; Peopel)                                                                                                                                                                                                                                                                                                                                                                                                                                                                                                                                                                                                                                                                                                                                                                                                                                                                                                                                                                                         | annual              | 1km                       | Worldpop<br><a href="https://www.worldpop.org/">https://www.worldpop.org/</a>                                                                                                 |
| Land Cover (LU)                                                                                                                                                                                                                                                                                                                                                                                                                                                                                                                                                                                                                                                                                                                                                                                                                                                                                                                                                                                                  | annual              | 300m                      | CCI (Climate Change Initiative)<br>( <a href="http://maps.elie.ucl.ac.be/CCI/viewer/index.php">http://maps.elie.ucl.ac.be/CCI/viewer/index.php</a> )                          |

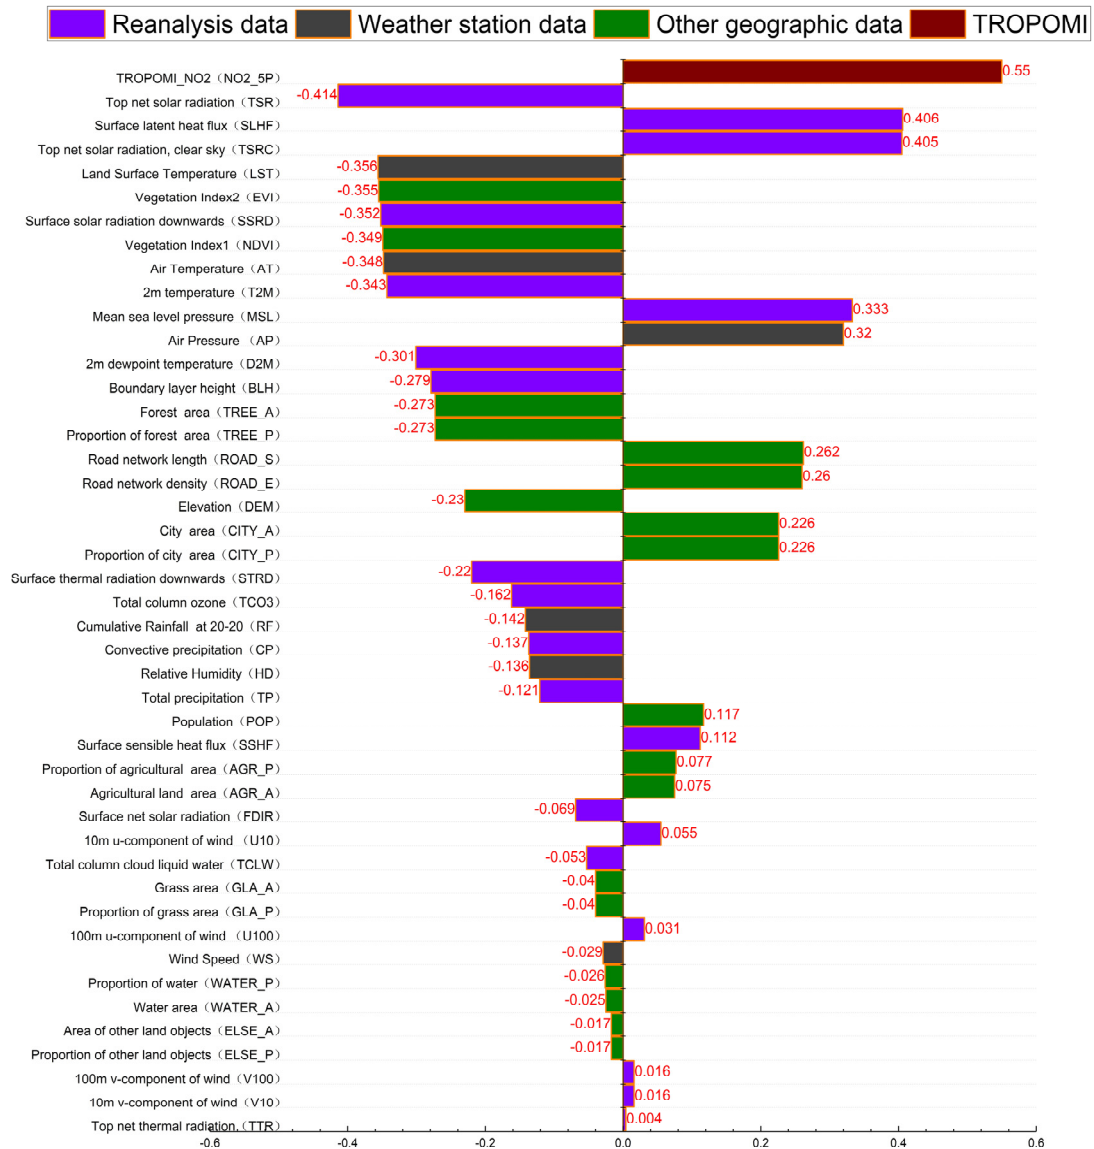

Pearson Correlation coefficient

(a)

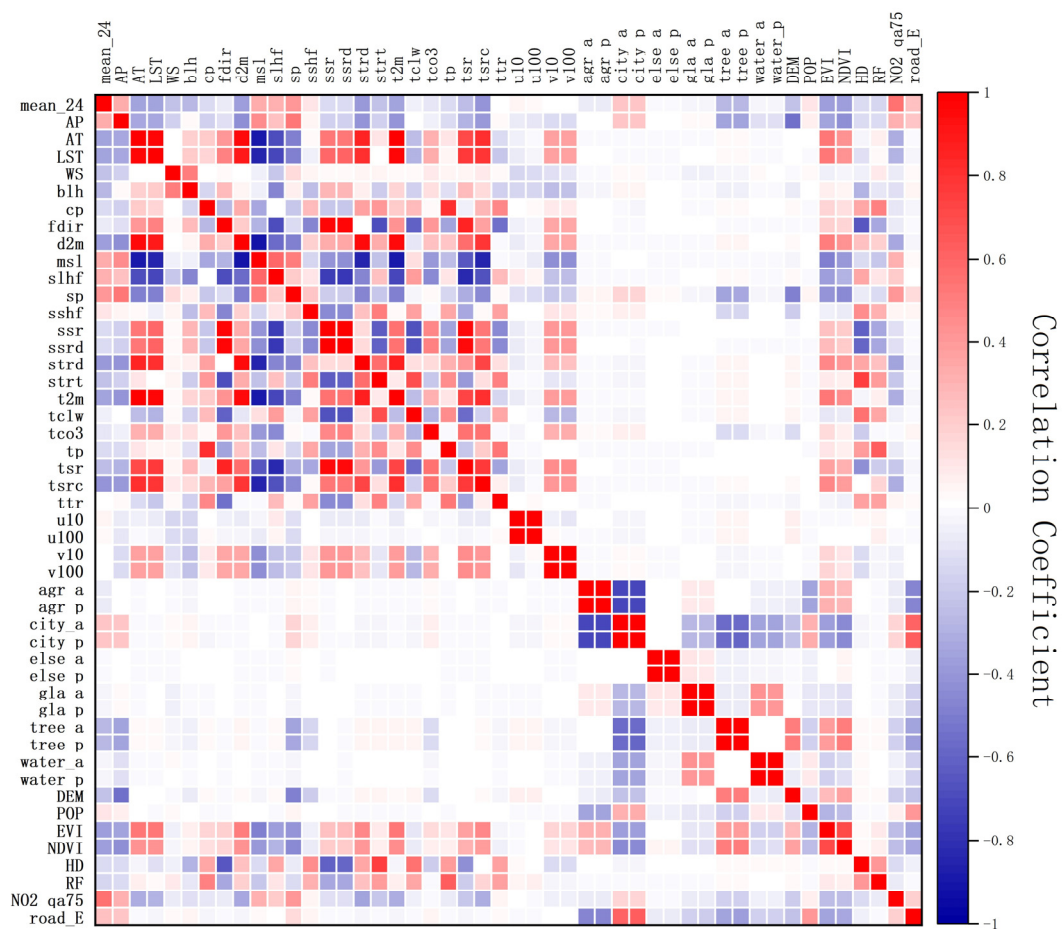

(b)

**Figure S1.** (a). Pearson correlation between the near-ground NO<sub>2</sub> concentrations and the explanatory variables. (b). Variable correlation heat map.

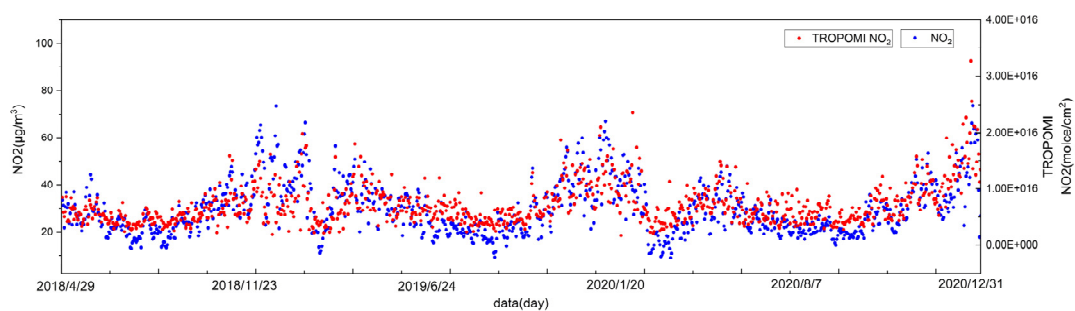

**Figure S2.** Time variation trend of NO<sub>2</sub> concentrations observed by TROPOMI and ground stations.

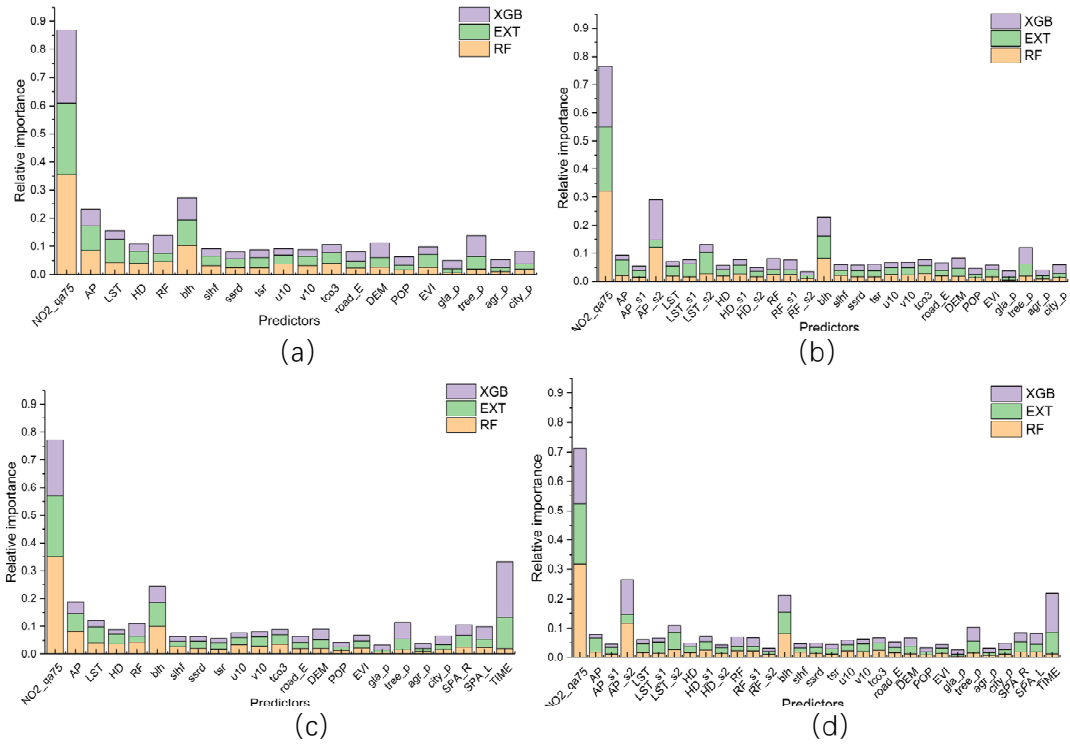

**Figure S3.** The relative importance of explanatory variables in the three machine learning methods of XGB, EXT and RF: (a) The relative importance of variables in the Plan 1; (b) The relative importance of variables in the Plan 2; (c) The relative importance of variables in the Plan 3; (d) The relative importance of variables in the Plan 4.

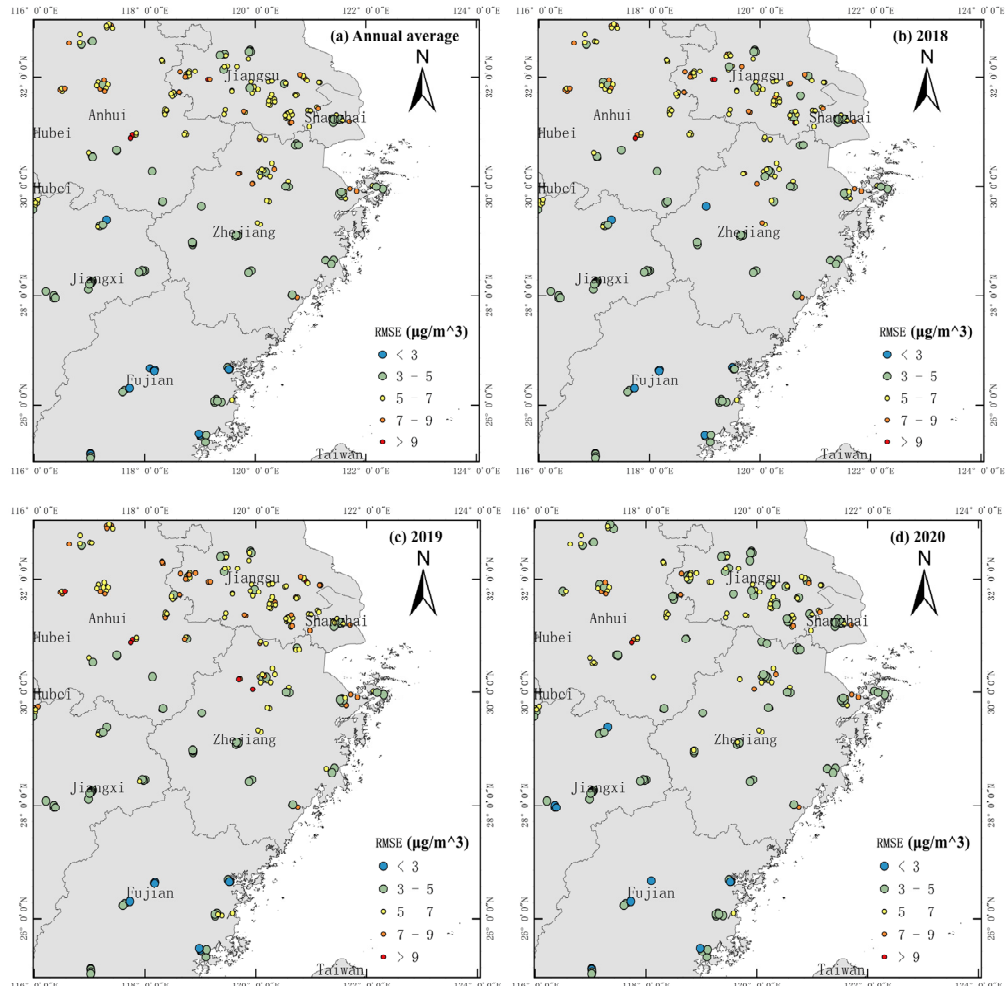

**Figure S4.** spatial distribution of the local RMSE values of the ensemble model.

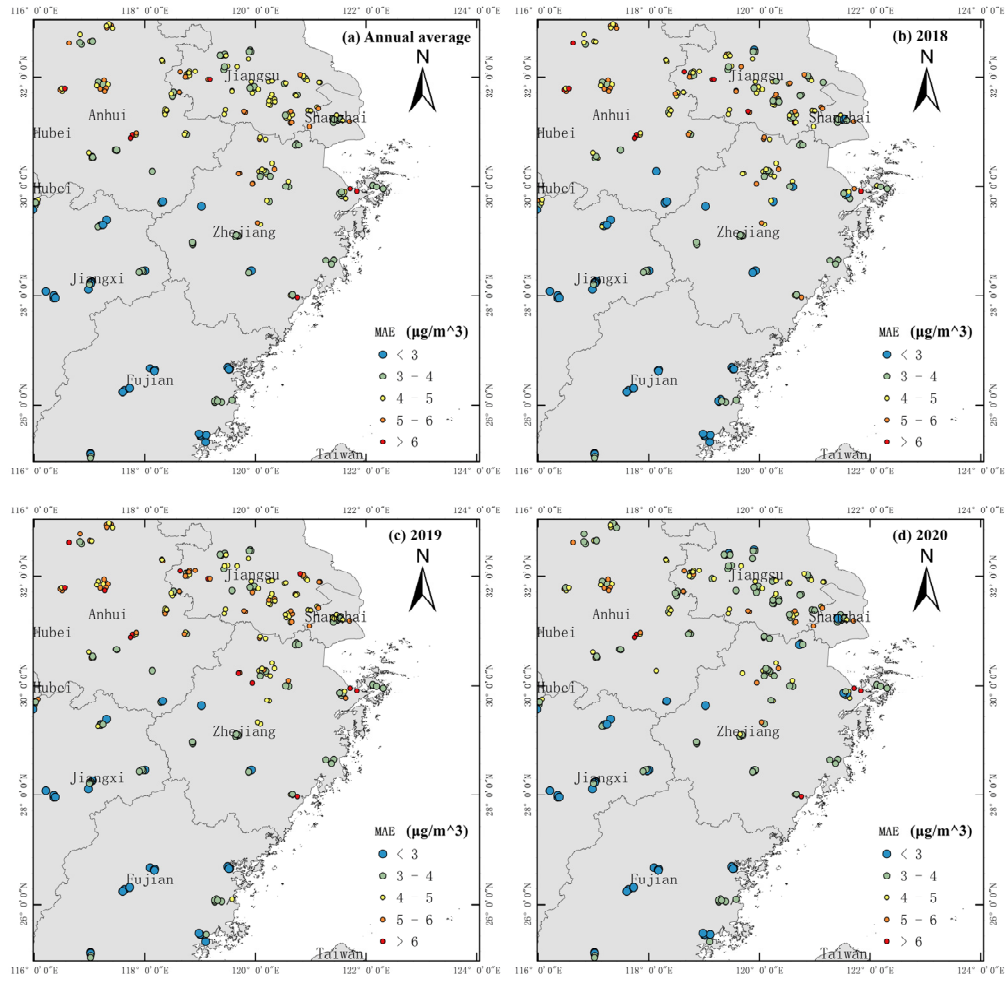

**Figure S5.** spatial distribution of the local MAE values of the ensemble model.

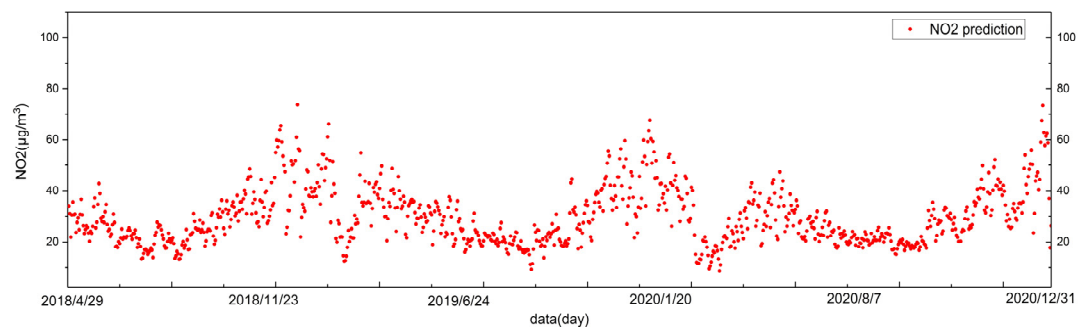

**Figure S6.** The daily average variation of NO<sub>2</sub> concentrations outputted by the ensemble model.

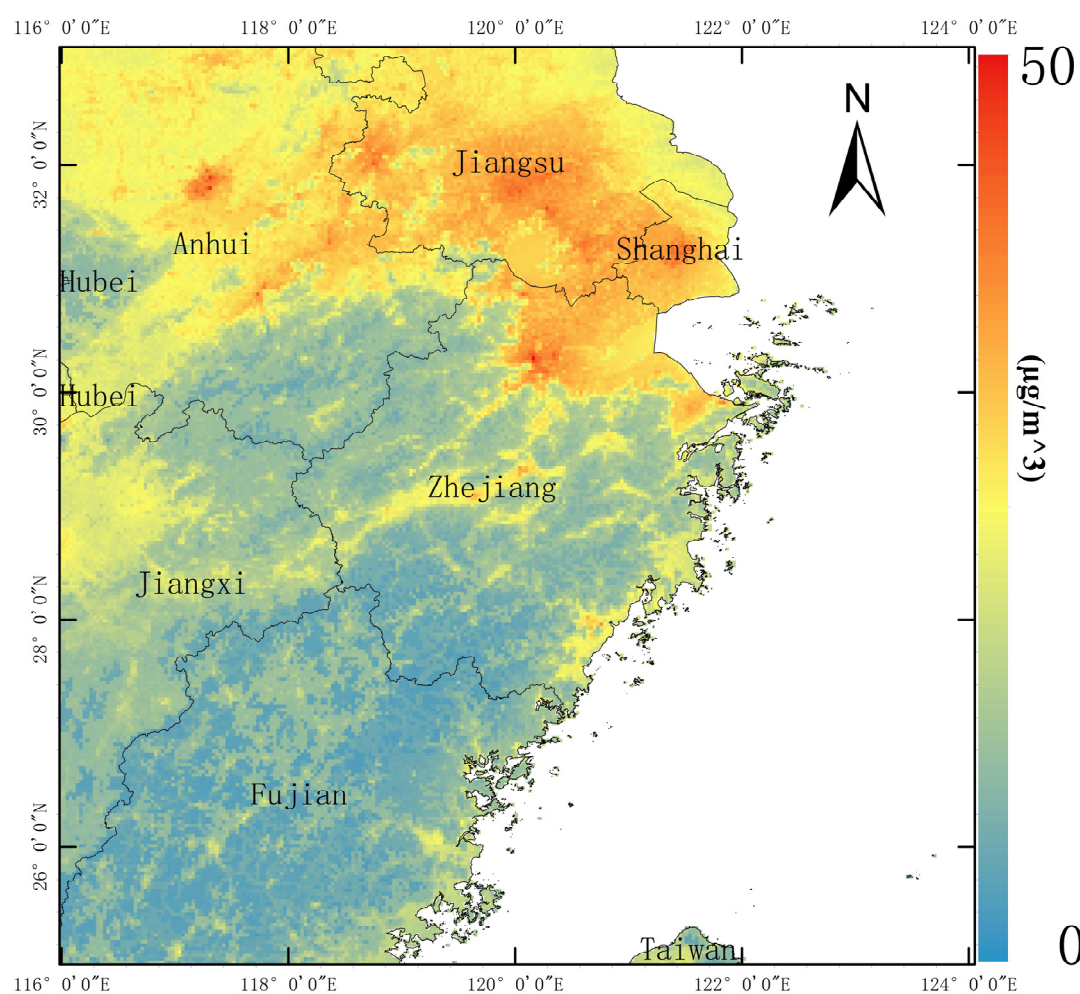

**Figure S7.** The distribution of the daily average NO<sub>2</sub> concentrations outputted by the ensemble model.



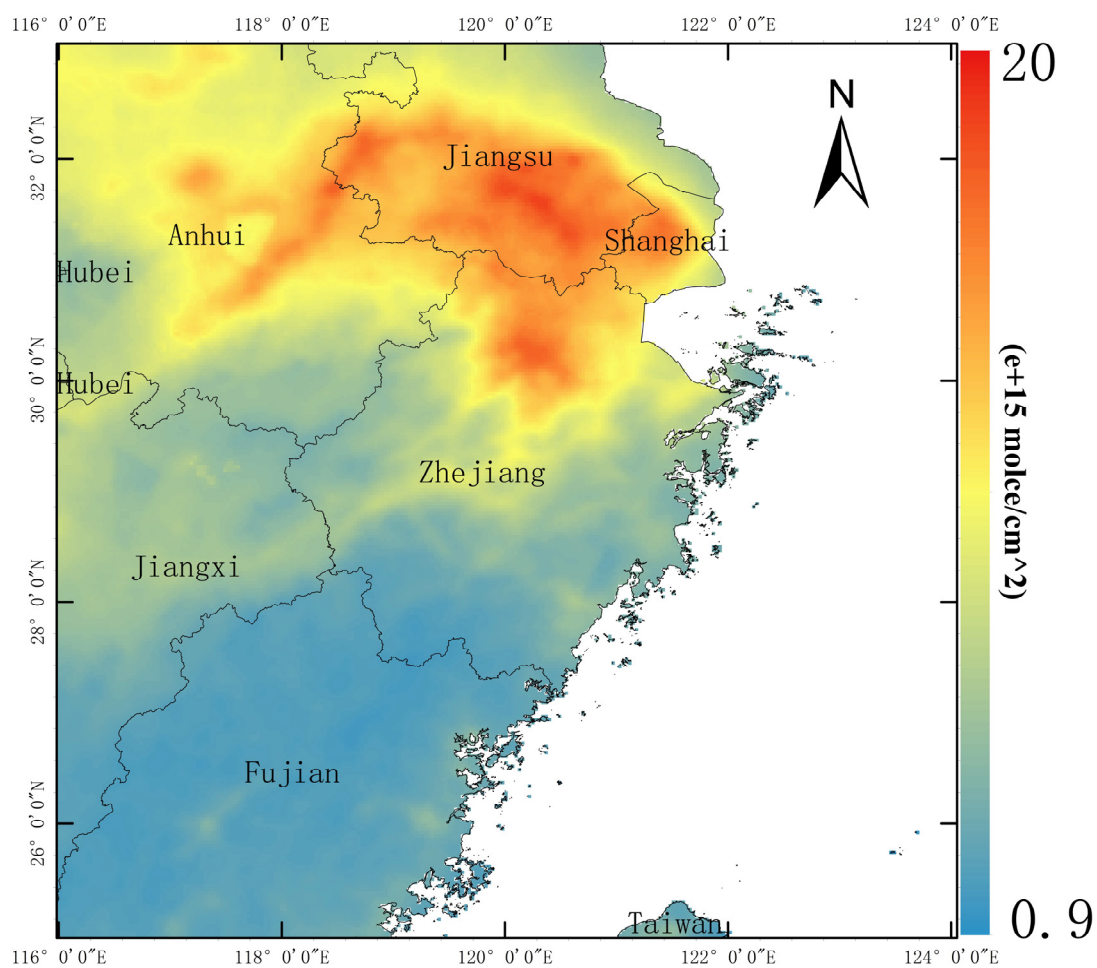

**Figure S8.** The distribution of daily average tropospheric NO<sub>2</sub> column concentrations interpolated from TROPOMI observations.

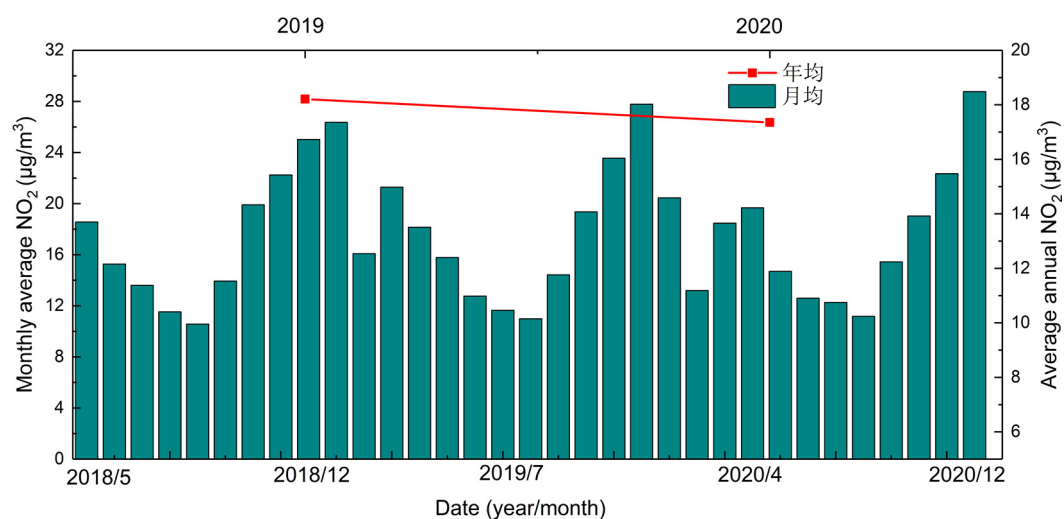

**Figure S9.** The monthly and annual average variation of NO<sub>2</sub> concentrations outputted by the ensemble model.
